# Supplementary material for: High-efficiently visible light-responsive photocatalysts: Ag3PO4 tetrahedral microcrystals with exposed {111} facets of high surface energy
Source: Royal Society of Chemistry journal article supplement (doi:10.1039/c3ta12946b), 2013-01-01
Supplement: c3ta12946b.pdf [file c3ta12946b.pdf]

## Supporting Information

### High-Efficiently Visible-Light-Responsive Photocatalysts: $\text{Ag}_3\text{PO}_4$ Tetrahedral

#### Microcrystals with Exposed $\{111\}$ Facets of High Surface Energy

BinjieZheng, Xue Wang, Chang Liu, Kai Tan\*, ZhaoxiongXie\*, Lansun Zheng

State Key Laboratory for Physical Chemistry of Solid Surfaces & Department of Chemistry, College of Chemistry and Chemical Engineering, Xiamen University, Xiamen 361005, China.

AUTHOR EMAIL ADDRESS: zxxie@xmu.edu.cn, ktan@xmu.edu.cn

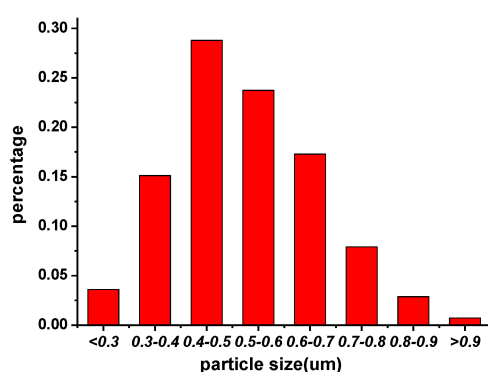

Fig. S1 The histogram of particle size distributions of the  $\text{Ag}_3\text{PO}_4$  tetrahedral microcrystals.

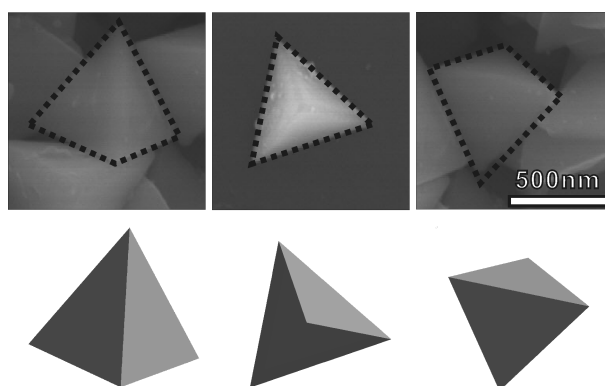

Fig.S2 A series of high-magnification SEM images and corresponding models of the tetrahedral  $\text{Ag}_3\text{PO}_4$  in different orientations.

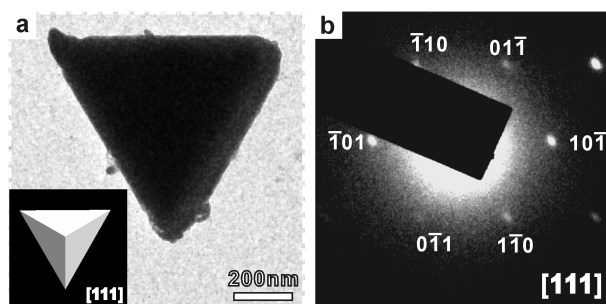

**Fig.S3** (a) Typical low-magnification TEM image and (b) the corresponding SAED pattern of a tetrahedral  $\text{Ag}_3\text{PO}_4$  sub-microcrystal viewed along the  $[111]$  direction. The TEM image agrees well with the schematic model of an ideal tetrahedron enclosed by  $\{111\}$  facets viewed along the  $[111]$  direction (inset in Fig. S3a), indicating that the surface of  $\text{Ag}_3\text{PO}_4$  sub-microcrystal consists of  $\{111\}$  facets.

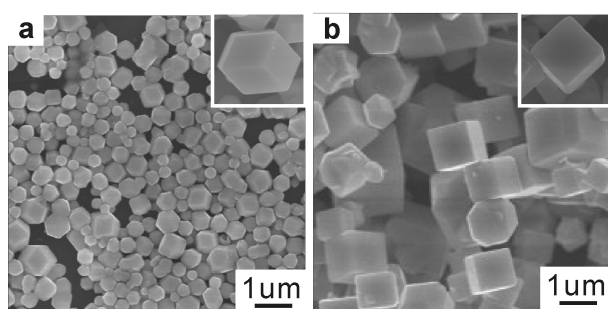

**Fig.S4** The SEM images of  $\text{Ag}_3\text{PO}_4$  sub-microcrystals with different morphologies: (a) rhombic dodecahedrons; (b) cubes.

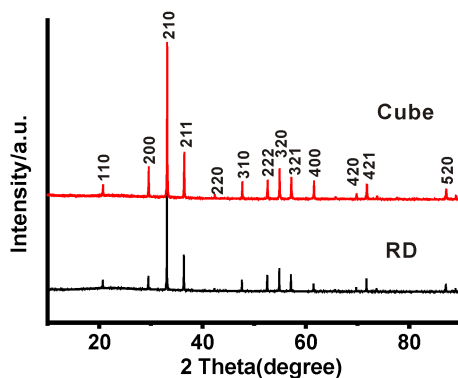

**Fig.S5** XRD patterns of  $\text{Ag}_3\text{PO}_4$  rhombic dodecahedrons and cubes.

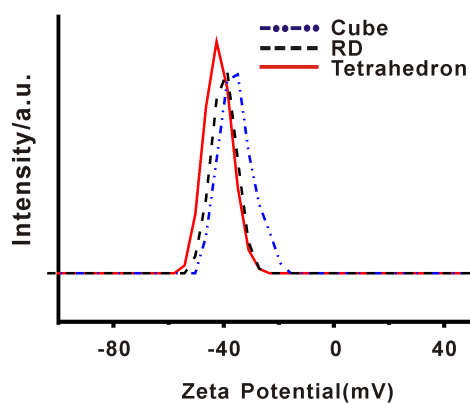

Fig. S6 Zeta potentials of Ag<sub>3</sub>PO<sub>4</sub> with difference morphologies.

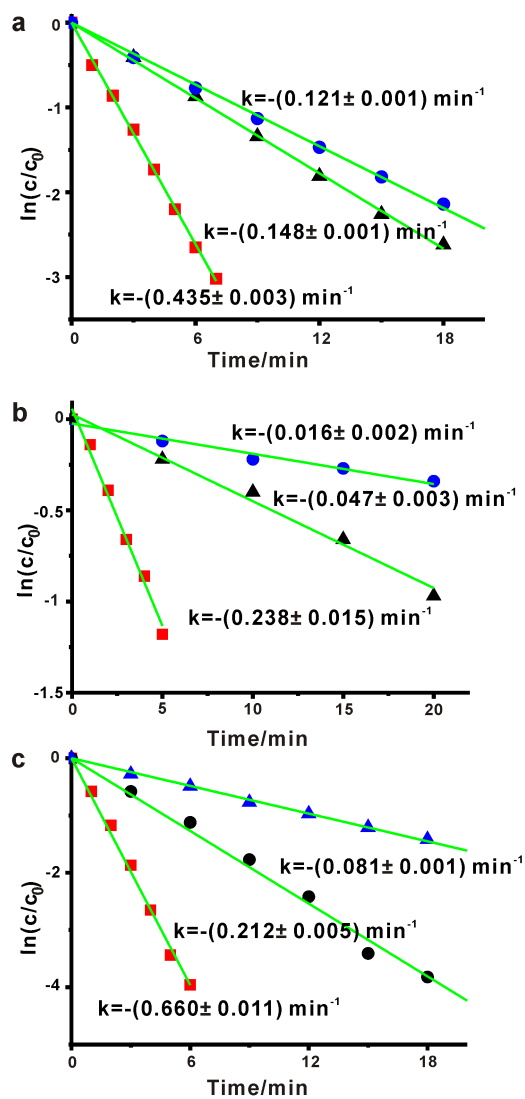

Fig. S7 Pseudo first-order reaction kinetics of (a) MB, (b) MO and (c) RhB degradation over Ag<sub>3</sub>PO<sub>4</sub> tetrahedra (■), rhombic dodecahedra (●) and cubes (▲).

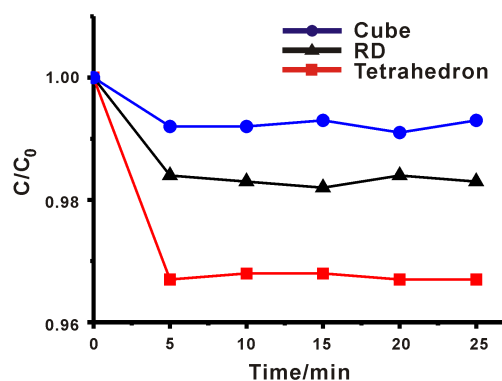

**Fig. S8** The adsorption properties of MB over  $\text{Ag}_3\text{PO}_4$  tetrahedra, rhombic dodecahedra and cubes under dark conditions.

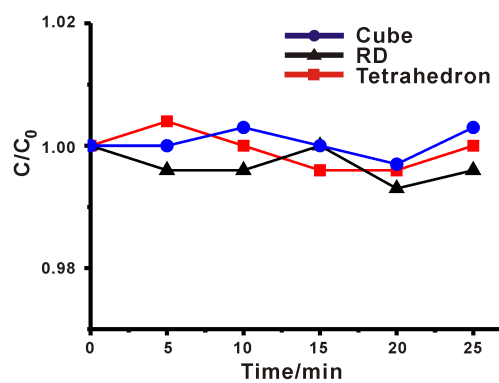

**Fig. S9** The adsorption properties of MO over  $\text{Ag}_3\text{PO}_4$  tetrahedra, rhombic dodecahedra and cubes under dark conditions.

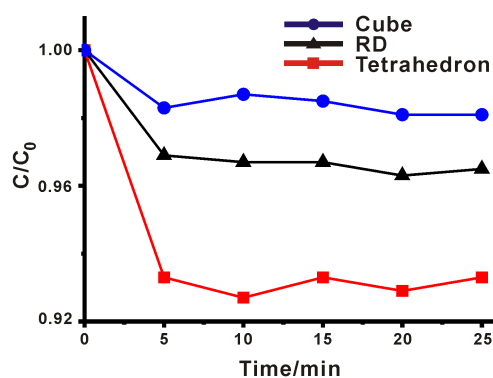

**Fig. S10** The adsorption properties of RhB over  $\text{Ag}_3\text{PO}_4$  tetrahedra, rhombic dodecahedra and cubes under dark conditions.
